# Supplementary material for: l -Arginine-modified gold nanoclusters for rapid and visual quantification of bacterial infection
Source: Royal Society of Chemistry journal article supplement (doi:10.1039/d5qi02149a), 2025-12-11
Supplement: d5qi02149a1.pdf [file d5qi02149a1.pdf]

## Supporting Information

### ***L*-Arginine-Modified Gold Nanoclusters for Rapid and Visual Quantification of Bacterial Infection**

Le Hong <sup>a,†</sup>, Lina Ding<sup>a,†</sup>, Zhenyu Ma<sup>c</sup>, Lin Wang<sup>a</sup>, Kun Wang<sup>a</sup>, Weinan Dong<sup>b</sup>, Manlin Qi<sup>a</sup>, Yujia Shi<sup>a</sup>, Chenyu Liu<sup>a</sup>, Xiaolin Sun<sup>\*a</sup>, Xue Bai<sup>\*b</sup>, Chunyan Li<sup>\*a</sup>, Zhennan Wu<sup>\*b</sup>

a Department of Oral Implantology, School and Hospital of Stomatology, Jilin University, Changchun, 130021, China.

b State Key Laboratory of Integrated Optoelectronics, JLU Region, Changchun, 130012, China.

c Department of Stomatology, Jilin Qianwei Hospital, Changchun, 130012, China.

E-mail: sunxiaolin@jlu.edu.cn, cyli@jlu.edu.cn, baix@jlu.edu.cn, wuzn@jlu.edu.cn

<sup>†</sup>These authors contributed to the work equally and should be regarded as co-first authors

**Table S1.** LB Medium Core Component List.

| Ingredient      | Content<br>(/ L) | Function                                                  | Relevance to This Study                                                                                               |
|-----------------|------------------|-----------------------------------------------------------|-----------------------------------------------------------------------------------------------------------------------|
| Tryptone        | 10 g             | Provide nitrogen sources such as amino acids and peptides | Contains multiple natural amino acids, simulating the coexisting environment of biomolecules                          |
| Yeast Extract   | 5 g              | Provides vitamins, growth factors, and micronutrients     | Contains trace amounts of peptides and metabolic intermediates, simulating the coexisting environment of biomolecules |
| NaCl            | 10g              | Maintain the osmotic pressure of the culture medium       | Inorganic ions do not participate in fluorescence signal-related reactions                                            |
| Deionized Water | 1L               | Solvent, maintaining system homogeneity                   | No additional interfering components                                                                                  |

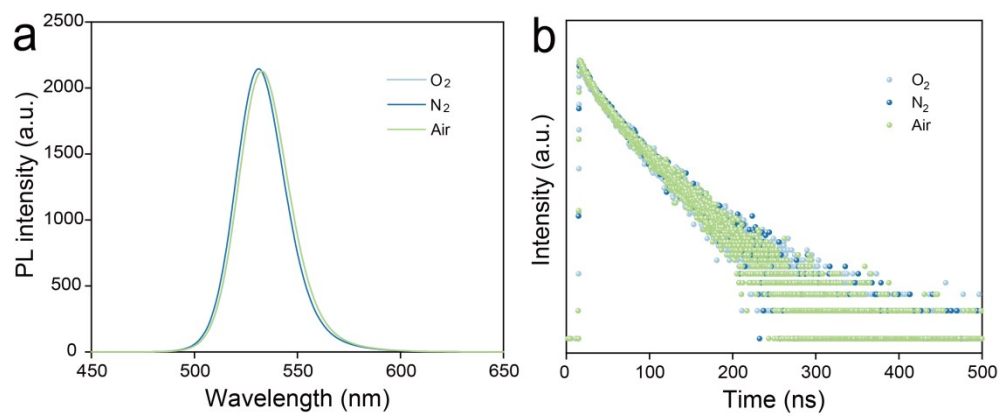

**Fig. S1.** PL spectra of Arg-ATT-Au NCs under  $O_2$ ,  $N_2$ , Air. (b) PL decay traces of Arg-ATT-Au NCs under  $O_2$ ,  $N_2$ , Air.

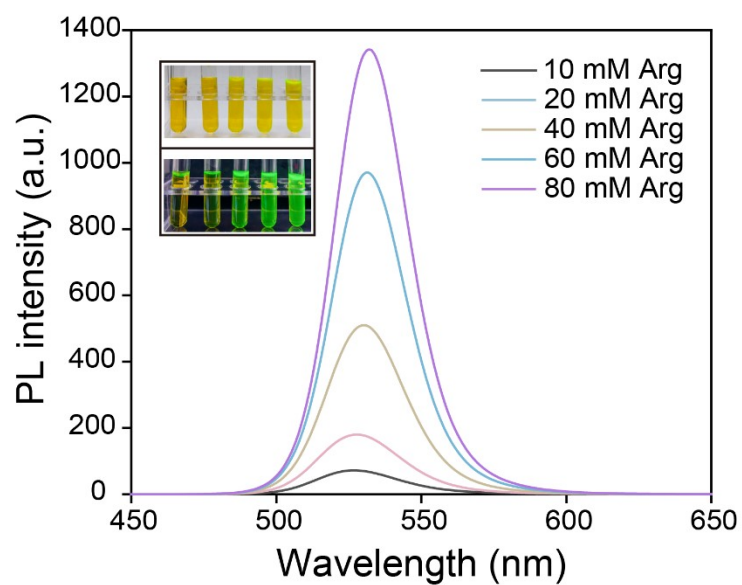

**Fig. S2.** PL spectra of Arg-ATT-Au NCs with varying Arg ligand concentrations (10 mM, 20 mM, 40 mM, 60 mM, 80 mM) under identical experimental conditions. (The pictures were captured at room temperature under non-excited conditions and 365 nm UV light excitation, respectively.)

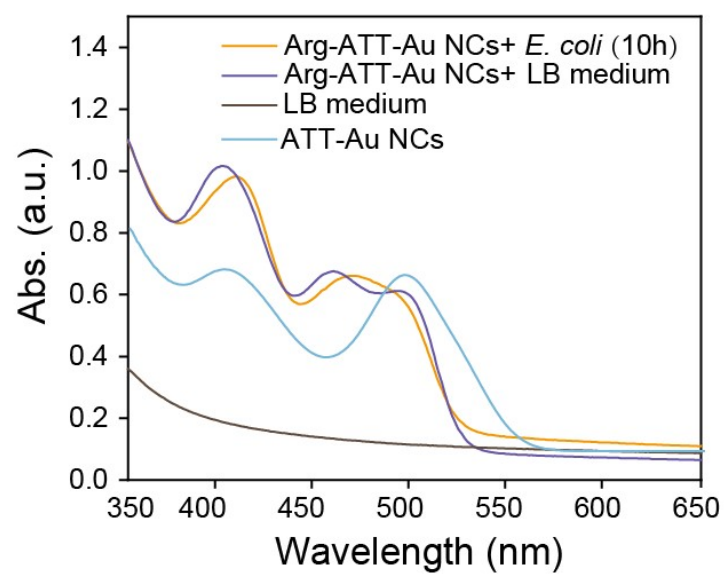

**Fig. S3.** UV - vis absorbance spectra of Arg-ATT-Au NCs with *E. coli*, Arg-ATT - Au NCs in LB Medium, ATT - Au NCs in LB Medium, and LB Medium alone.

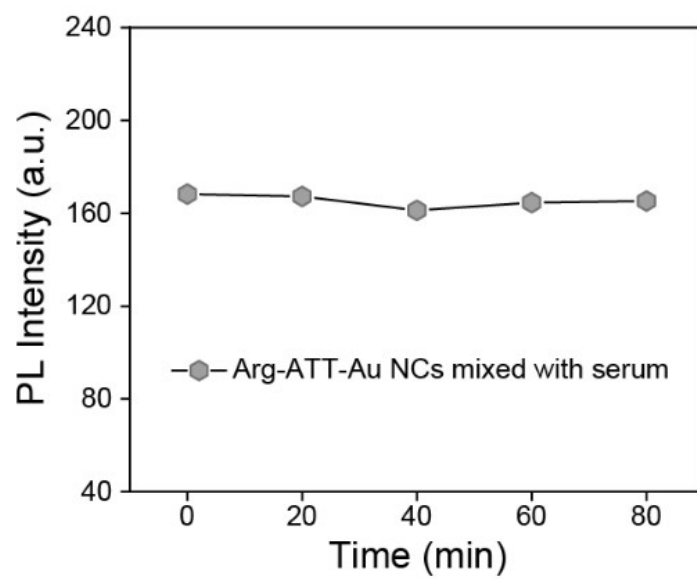

**Fig. S4.** PL spectra of Arg-ATT-Au NCs with serum were measured every 20 min.

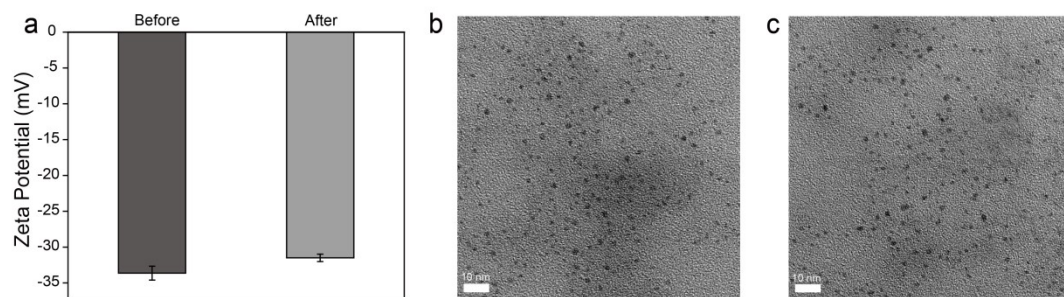

**Fig. S5.** (a) ZETA of Arg-ATT-Au NCs (Before and after co-culture with serum). (b) TEM images and size of Arg-ATT-Au NCs (Before co-culture with serum) (c). After co-culture with serum for 80 min. (Scale bar: 10 nm.)

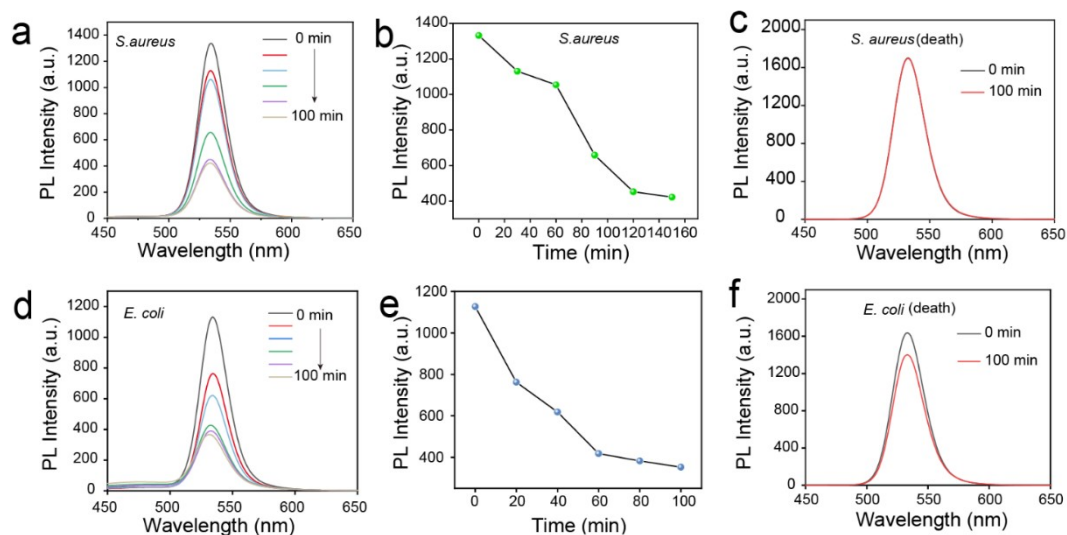

**Fig. S6.** Time-dependent photoluminescence spectra of a mixed solution with bacteria at a concentration of  $10^7$  (CFU mL<sup>-1</sup>) and Arg-ATT-Au NCs.



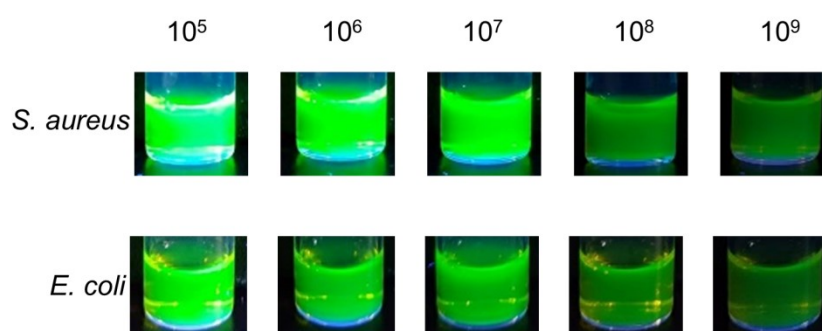

**Fig. S7.** Digital images of concentration-dependent fluorescence intensity of different bacterial concentrations.

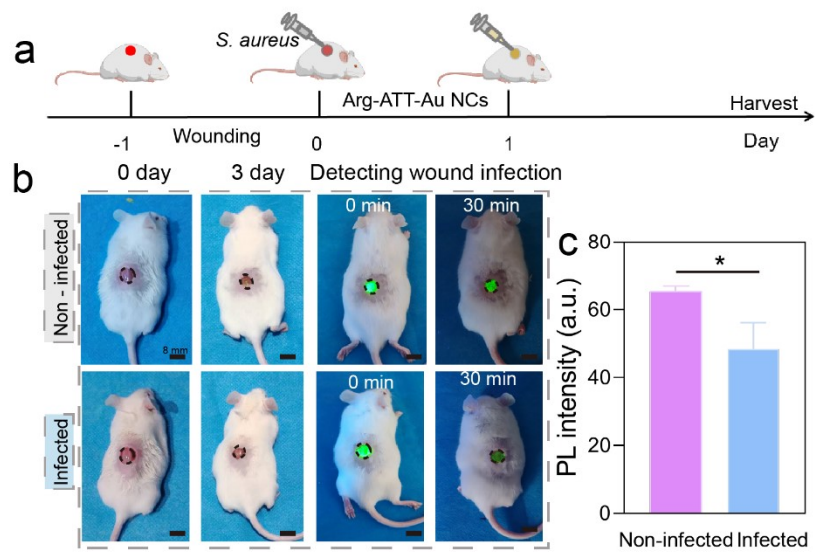

**Fig. S8.** Detection of back skin infected wounds in mice with Arg-ATT-Au NCs. (a) Scheme of detecting *S. aureus* infected dorsal wounds using Arg-ATT-Au NCs. (b) Representative images of skin wounds were captured at -1, 0, and 3 days for the group of non-infected wounds and the infected wound groups. Scale bar: 8 mm. (c) The average PL intensity of the fluorescent area of the dorsal wound after 30 min (excitation wavelength 365 nm) was determined using Image J software. (n = 3, p < 0.05, error bars indicate means± standard deviations.)

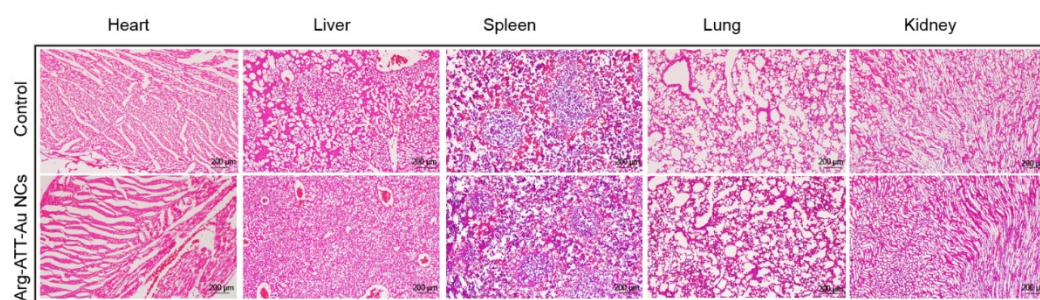

**Fig. S9.** Images of H&E staining of heart, liver, spleen, lung, and kidney from the control group, Arg-ATT-Au NCs, and ATT-Au NCs group. Scale bar: 200  $\mu\text{m}$ . (n = 3 independent experiments).

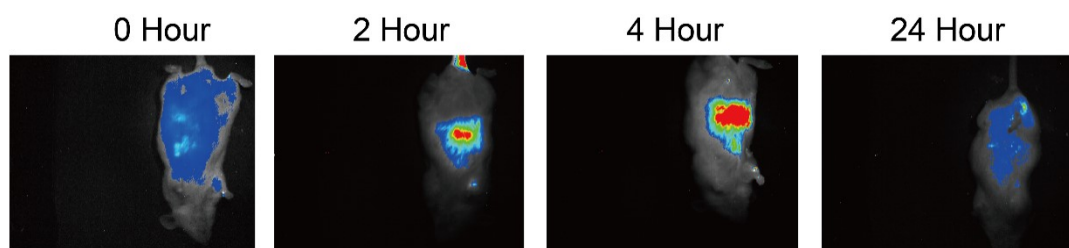

**Fig. S10.** *In vivo* imaging in BALB mice of Arg-ATT-Au NCs metabolism at various time points (0, 1, 2, and 24 hours).

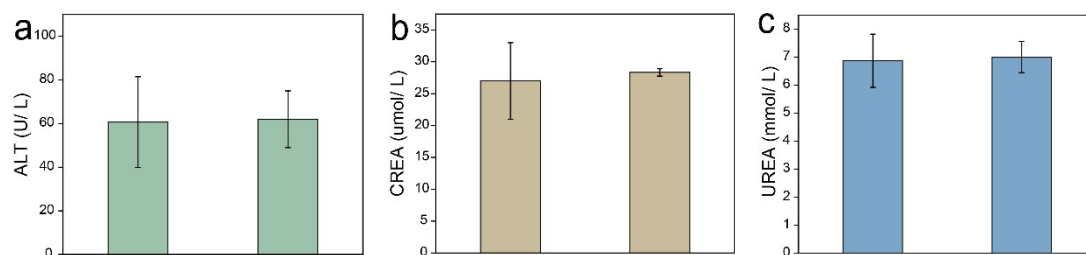

**Fig. S11.** The effects of Arg-ATT-Au NCs and ATT-Au NCs on the liver and kidney function. The blood levels of ALT (a), CREA (b), and UREA (c) were measured by biochemical methods ( $n = 3$ , error bars indicate means $\pm$ standard deviations).

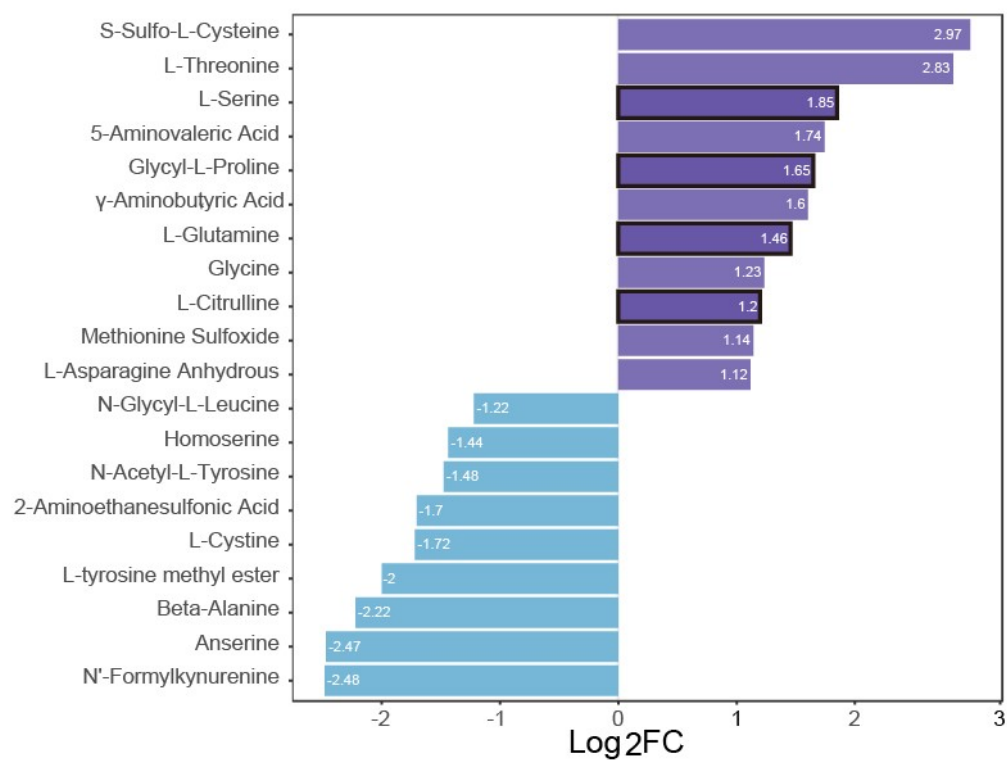

**Fig. S12.** Differential amino acid metabolites of *S. aureus* between the group of control and the Arg-ATT-Au NCs.

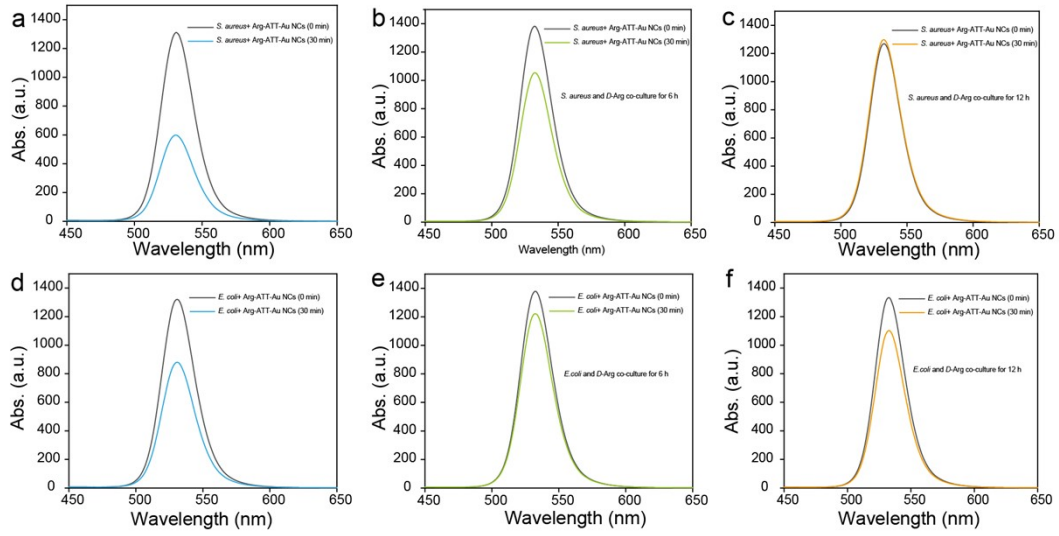

**Fig. S13.** (a) The PL spectrum of Arg-ATT-Au NCs for detection of *S. aureus*. (b, c) The PL spectrum of Arg-ATT-Au NCs for detection of *S. aureus* co-culture with *D-Arg* after 6 h (b) and 12 h (c). (d) The PL spectrum of Arg-ATT-Au NCs for the detection of *E. coli*. (e, f) The PL spectrum of Arg-ATT-Au NCs for detection of *E. coli* co-culture with *D-Arg* after 6 h (e) and 12 h (f).
